# Supplementary material for: DEAD Box Helicase 24 Is Increased in the Brain in Alzheimer’s Disease and AppN-LF Mice and Influences Presymptomatic Pathology
Source: MDPI journal article supplement (doi:10.3390/ijms25073622), 2024-03-23
Supplement: s1 [file s1]

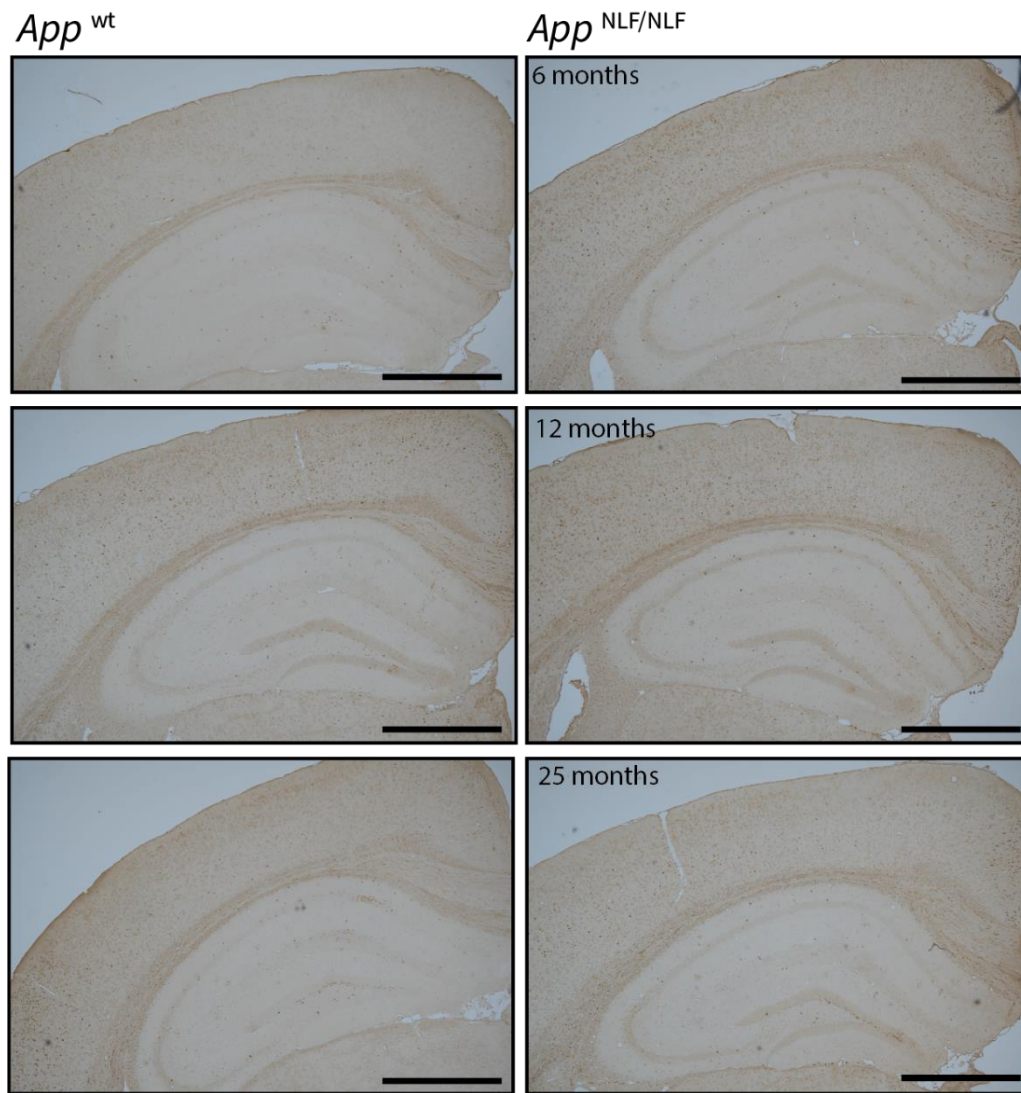

Supplemental figure S1: DDX24 staining in 6 months, 12 months and 25 months old WT and *App*<sup>NLF/NLF</sup> mice. Scale bar is 150  $\mu$ m.

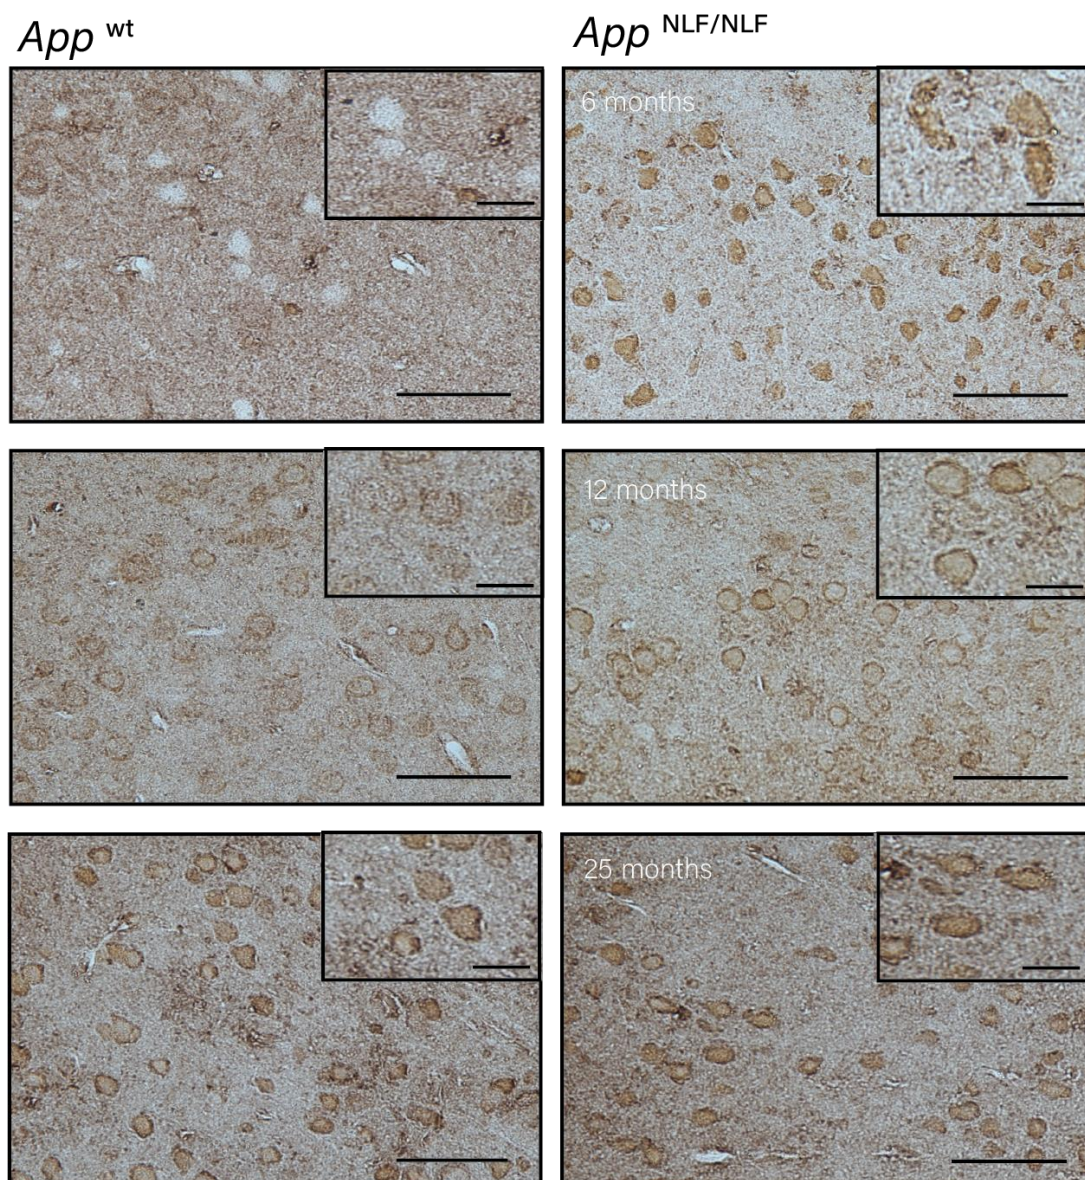

Supplemental figure S2: DDX24 staining in CA3 region of WT and *App*<sup>NLF/NLF</sup> mice at 6 months, 12 months and 25 months of age. Scale bar is 50  $\mu$ m in large images and 25 in fold in images.

Supplemental figure S3: Confocal staining of DDX24 in neurites of primary hippocampal neurons derived from WT and *App*<sup>NLF-NLF</sup> mice cultured for 7 (A-B), 14 (C-D) and 21 (E-F) DIV. DDX24 is shown in green and phalloidin in white. Scale bars are 5  $\mu$ m.
