# Supplementary figures and images for: DEAD Box Helicase 24 Is Increased in the Brain in Alzheimer’s Disease and AppN-LF Mice and Influences Presymptomatic Pathology
Source: MDPI journal article supplement (doi:10.3390/ijms25073622), 2024-03-23

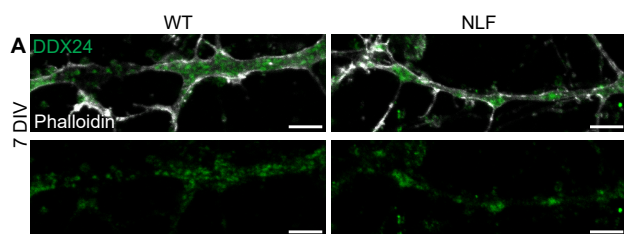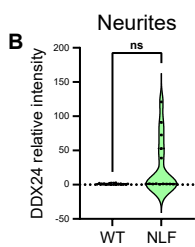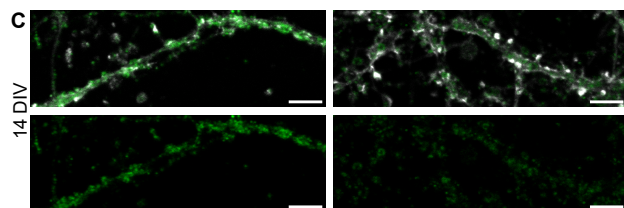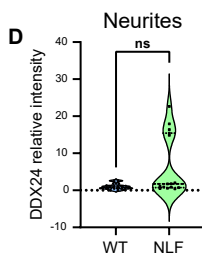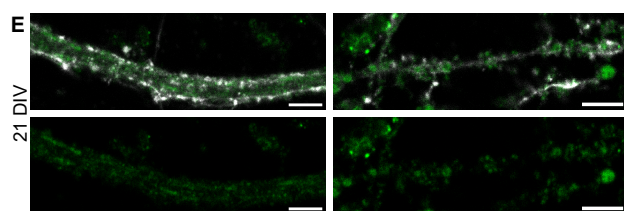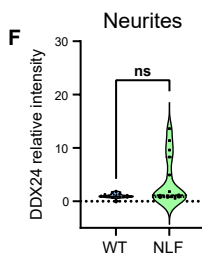

Supplement: s1 [file s1]
